# Supplementary material for: Synthesis and properties of novel polyimide fibers containing phosphorus groups in the main chain
Source: Royal Society of Chemistry journal article supplement (doi:10.1039/c6ra02344d), 2016-01-01
Supplement: c6ra02344d1.pdf [file c6ra02344d1.pdf]

# **Supplementary Information**

## **Synthesis and Properties of Novel Polyimide Fibers Containing Phosphorus Groups in the Main Chain**

Yong Zhao,<sup>a,b</sup> Tao Feng,<sup>c</sup> Guomin Li,<sup>a</sup> Fangfang Liu,<sup>a</sup> Xuemin Dai,<sup>a</sup> Zhixin Dong,<sup>a\*</sup>  
Xuepeng Qiu<sup>a\*</sup>

<sup>a</sup> Polymer Composites Engineering Laboratory, Changchun Institute of Applied  
Chemistry, Chinese Academy of Sciences, Changchun 130022, P. R. China

<sup>b</sup> University of Chinese Academy of Sciences, Beijing 100049, P. R. China

<sup>c</sup> Academy of Space Electronic Information Technology

\* Correspondence to: Xuepeng Qiu and Zhixin Dong (Tel: +86-0431-85262095;

E-mail: [xp\\_q@ciac.ac.cn](mailto:xp_q@ciac.ac.cn), [zxdong@ciac.ac.cn](mailto:zxdong@ciac.ac.cn) )

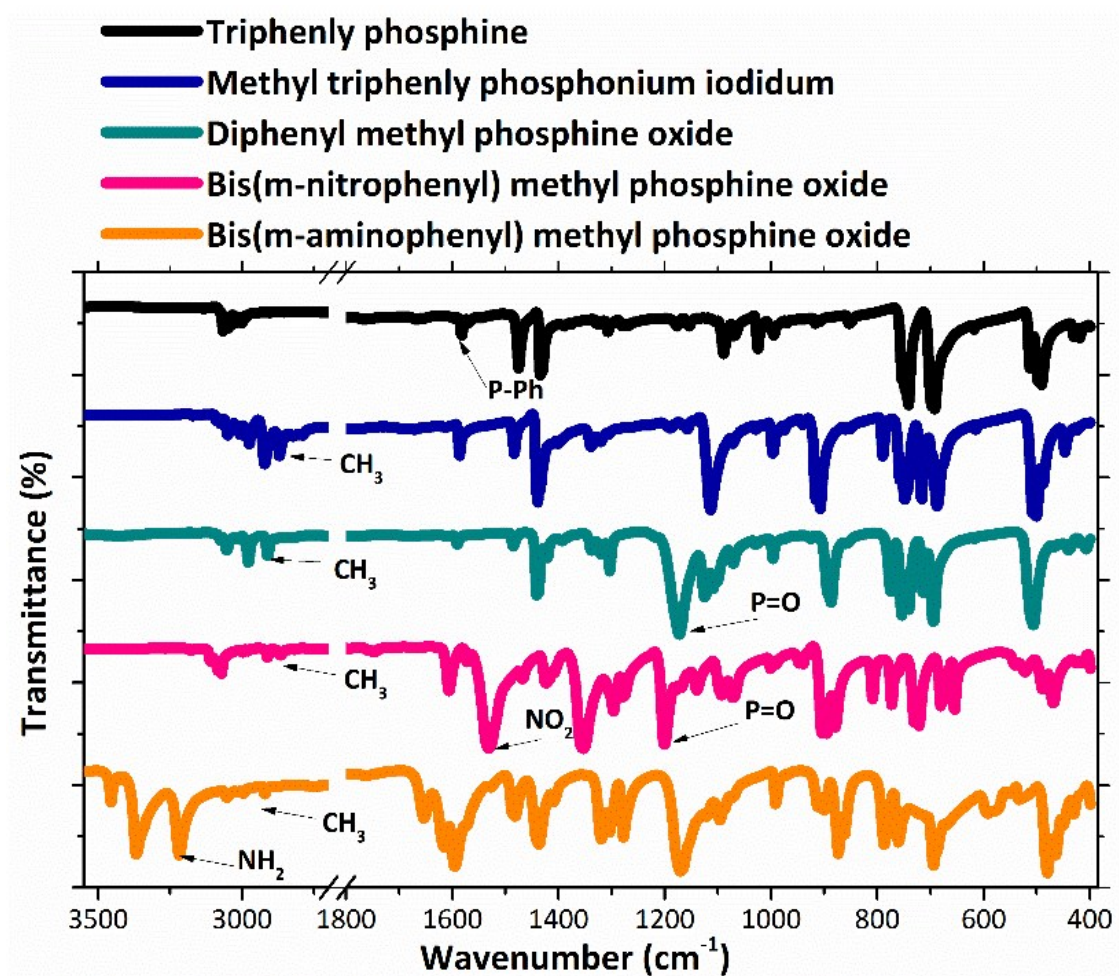

**FIG. S1.** Synthetic route of bis(m-aminophenyl) methyl phosphine oxide (DAMPO)

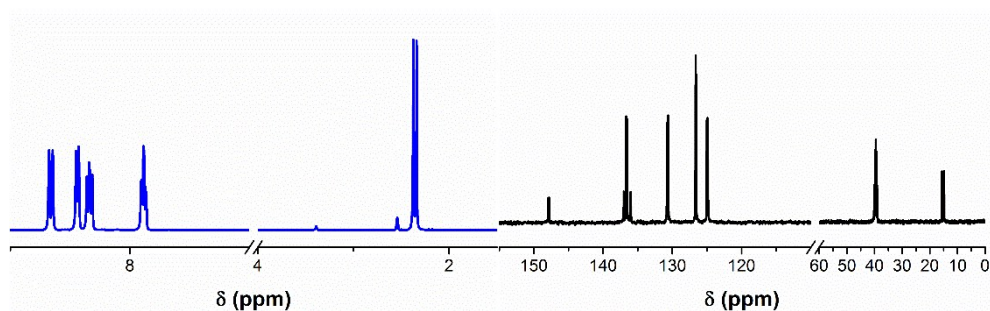

**FIG. S2.**  $^1\text{H}$  NMR (blue) and  $^{13}\text{C}$  NMR (black) spectra of DNMPPO.

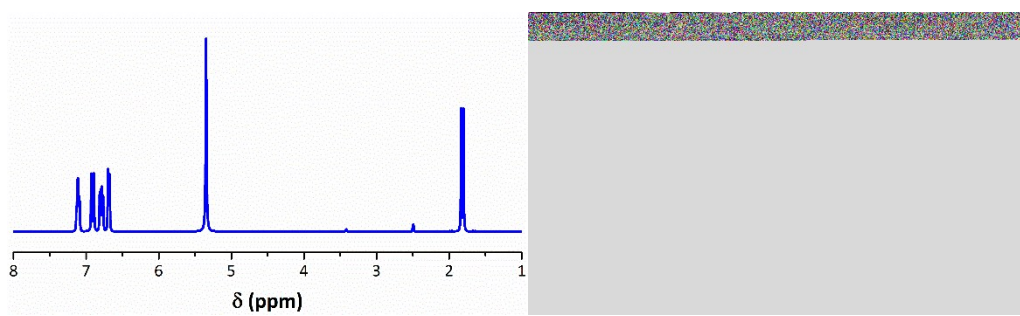

**FIG. S3.**  $\text{H}^1$  NMR (blue) and  $\text{C}^{13}$  NMR (black) spectra of DAMPO.
